# Supplementary material for: Population based ant colony optimization for reconstructing ECG signals
Source: Springer Nature journal article supplement (doi:10.1007/s12065-016-0139-0), 2016-07-30
Supplement: 12065_2016_139_MOESM1_ESM.pdf [file 12065_2016_139_MOESM1_ESM.pdf]

# Supplementary Material: Population Based Ant Colony Optimization for Reconstructing ECG Signals

Yih-Chun Cheng · Tom Hartmann · Pei-Yun Tsai · Martin Middendorf

Received: date / Accepted: date

## S1 Supplementary Figures

---

Yih-Chun Cheng · Pei-Yun Tsai  
Department of Electrical Engineering, National Central University,  
Taoyuan City, Taiwan  
E-mail: {101521083,pytsai}@cc.ncu.edu.tw

Tom Hartmann · Martin Middendorf  
Parallel Computing and Complex Systems Group, Institute of  
Computer Science, University Leipzig, Leipzig, Germany  
E-mail: {thartmann,middendorf}@informatik.uni-leipzig.de

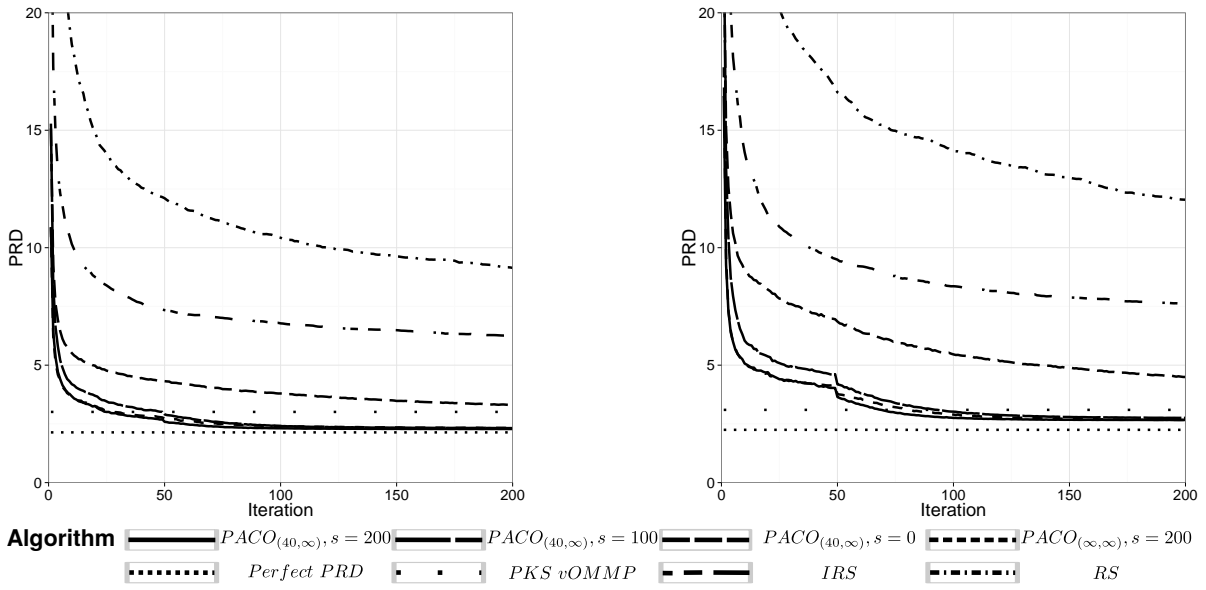

**Fig. S1:**

Average PRD performance for the PACO algorithm with different time windows and different number of local search steps, for the two random search heuristics IRS and RS; perfect PRD values and PKS vOMMP are given for comparison;  $PACO_{\omega}$  denotes the PACO algorithm with time window  $\omega$ ; left: results for the easy signal data set; right: results for the hard data set.

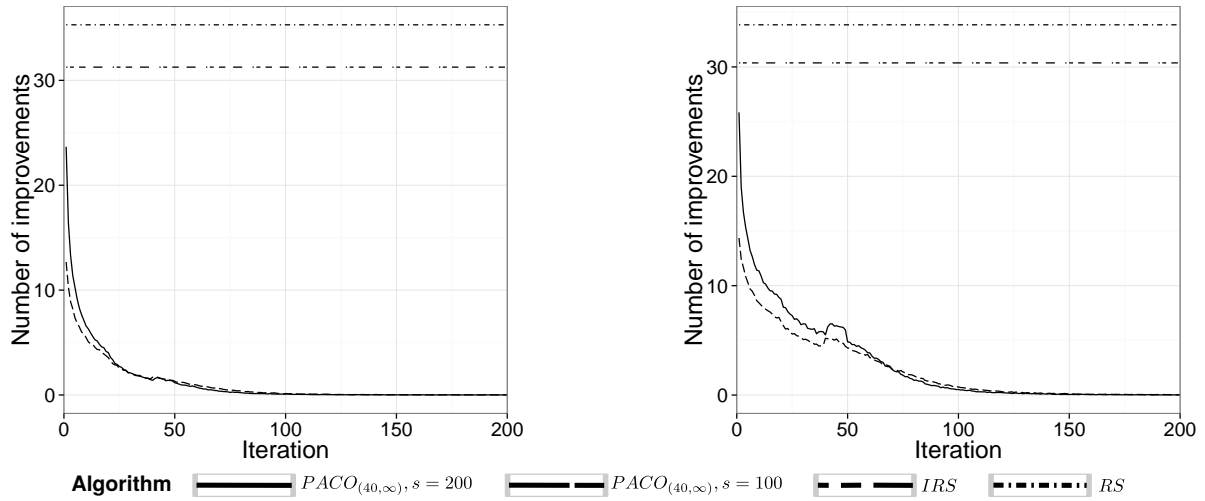

**Fig. S2:**

Number of improvements of local search procedure. The average number of improvements of both random search algorithms IR and IRS is included.
